# Supplementary material for: Comprehensive transcriptional analysis of pig facial skin development
Source: PeerJ journal article supplement (doi:10.7717/peerj.15955), 2023-08-28

**A**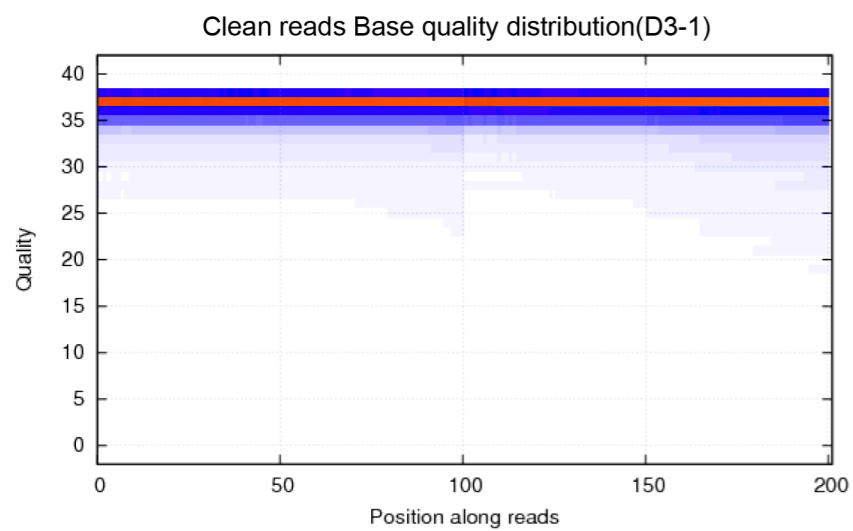**B**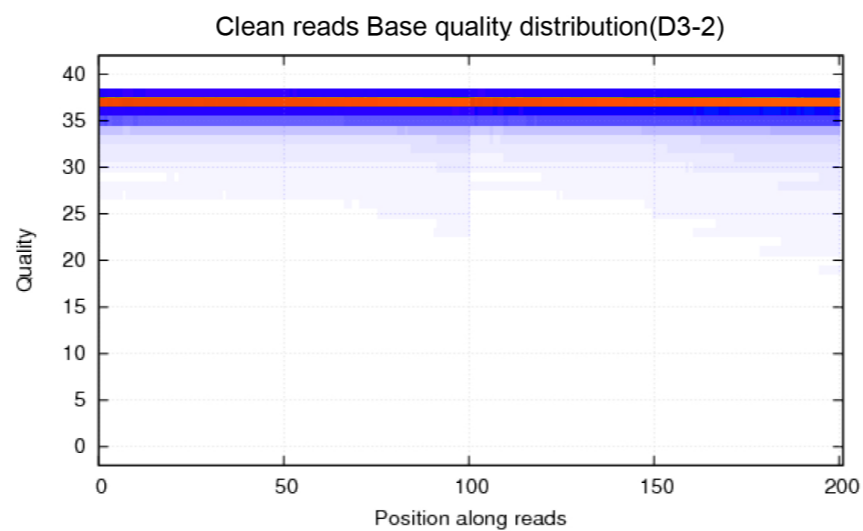**C**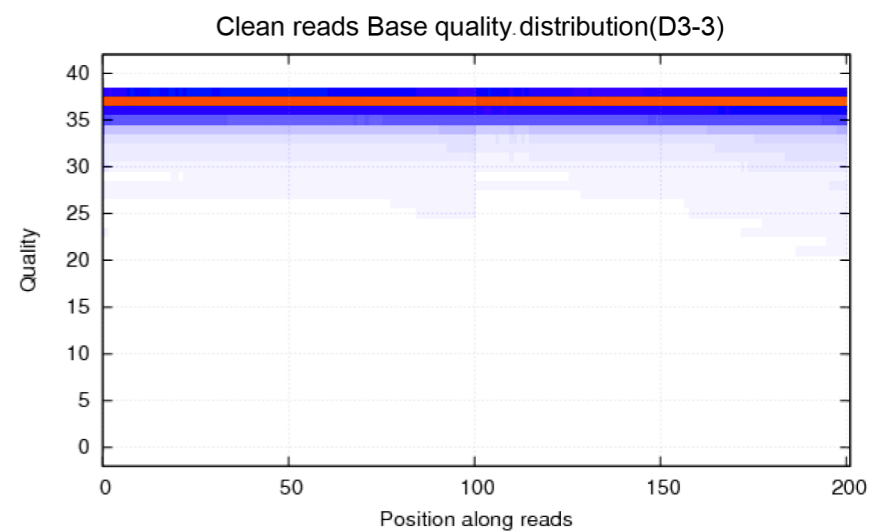**D**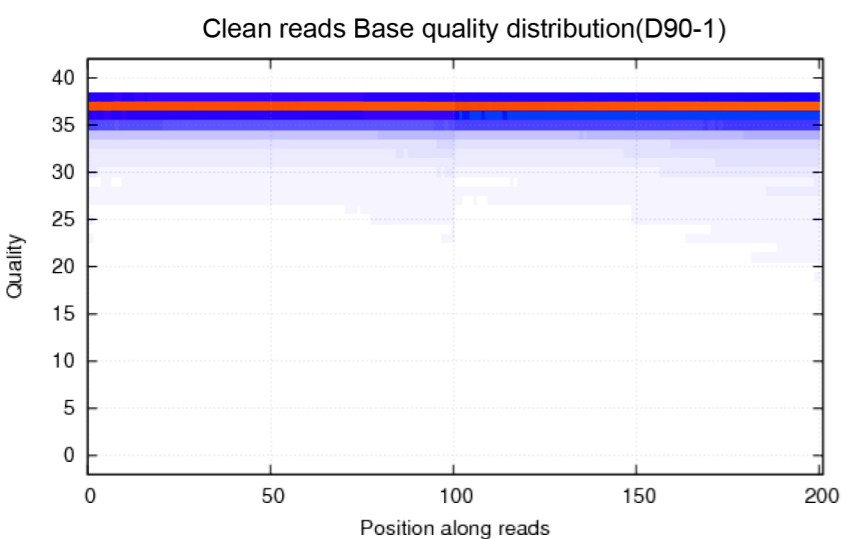**E**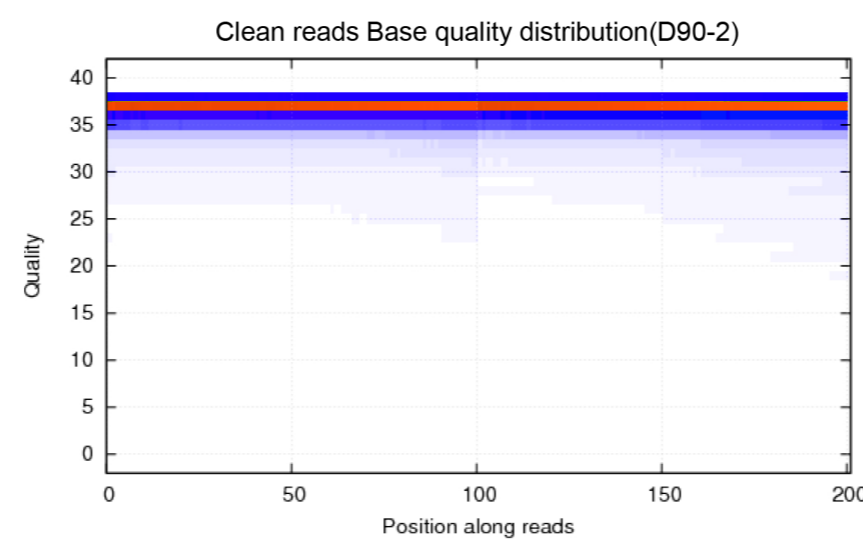**F**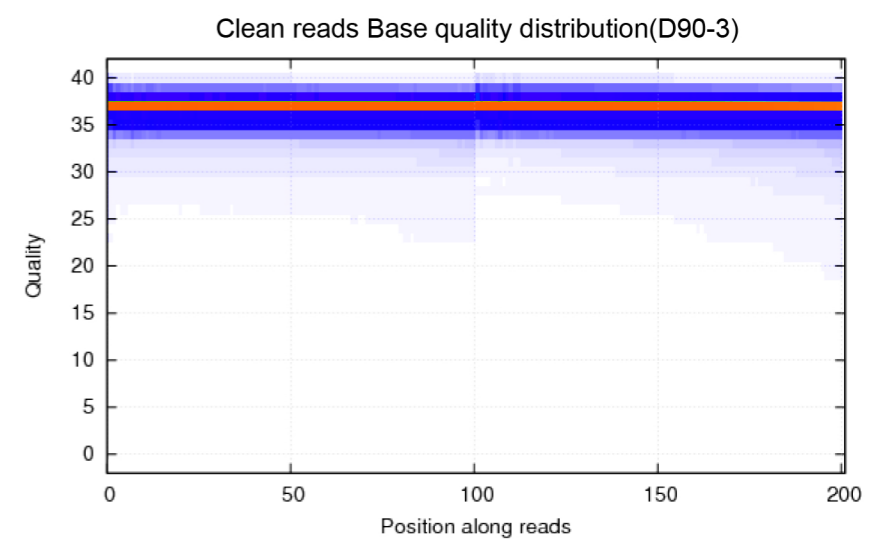**G**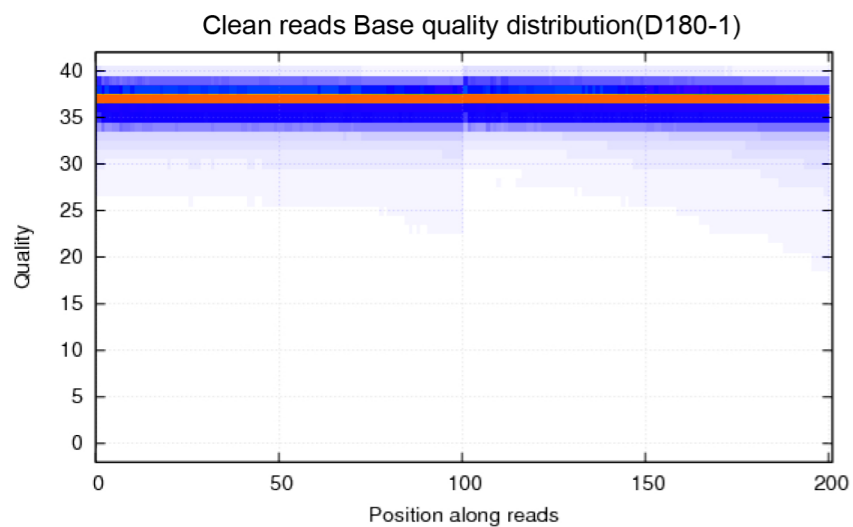**H**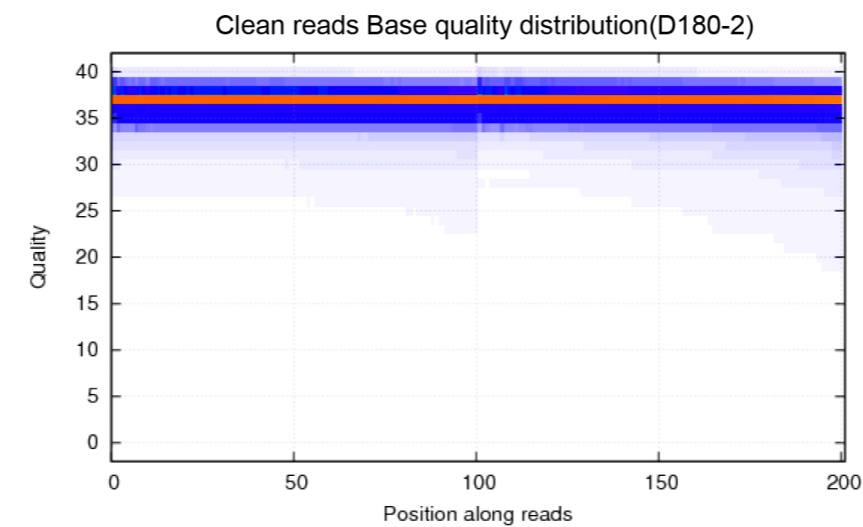**I**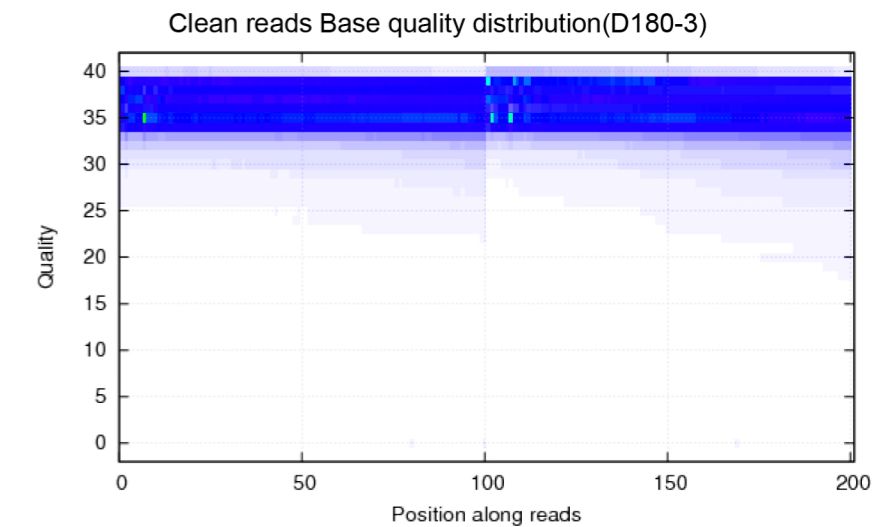**J**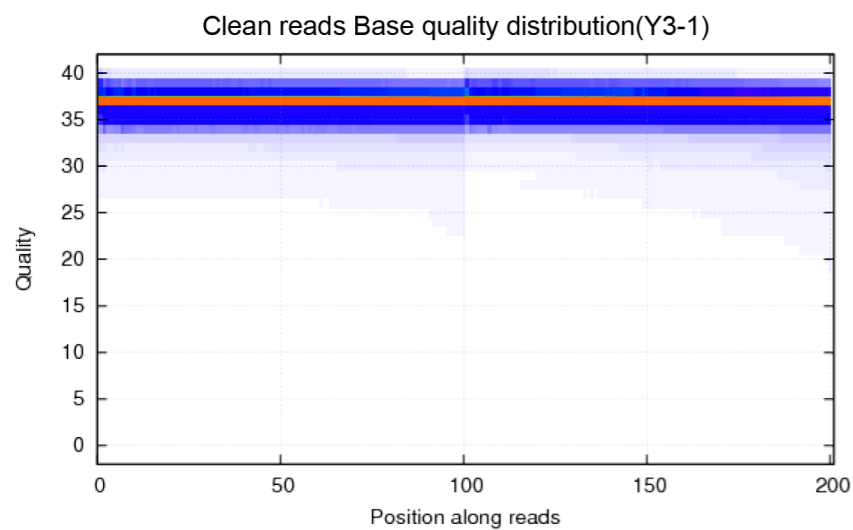**K**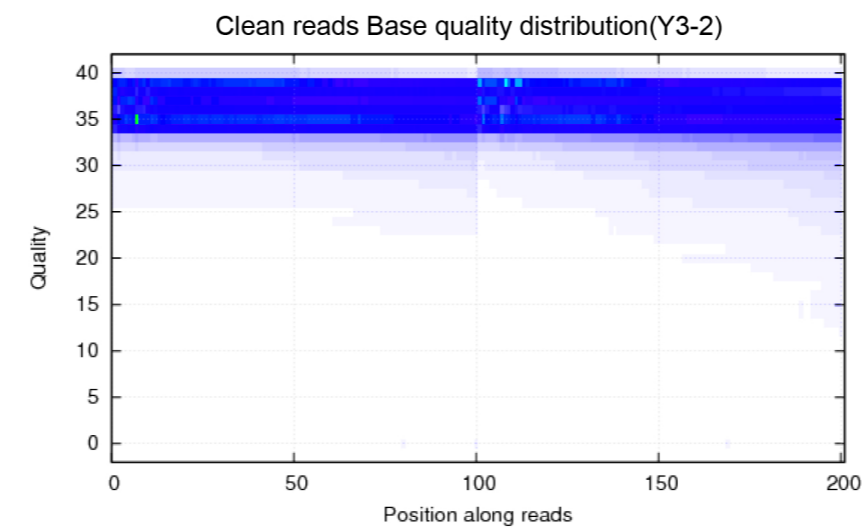**L**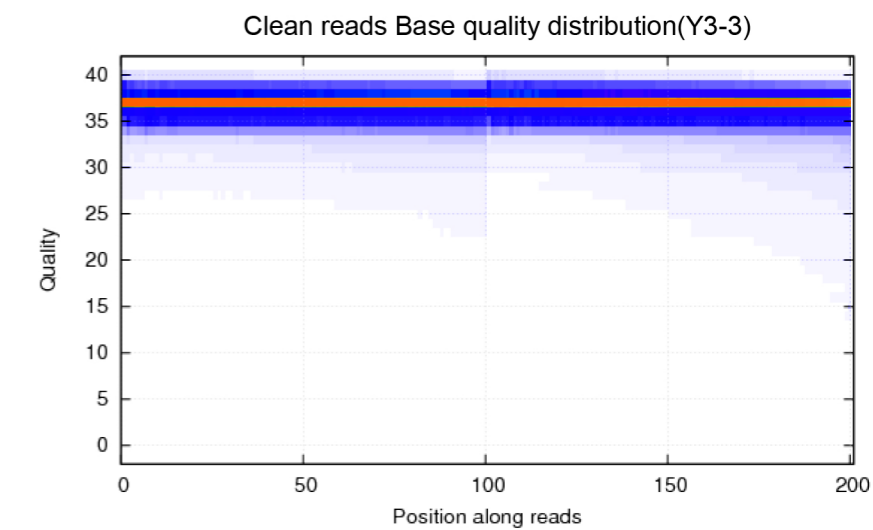

Supplement: Fig._S3.pdf [file Fig._S3.pdf]
