# Supplementary material for: Comprehensive transcriptional analysis of pig facial skin development
Source: PeerJ journal article supplement (doi:10.7717/peerj.15955), 2023-08-28

A

D180 / D90

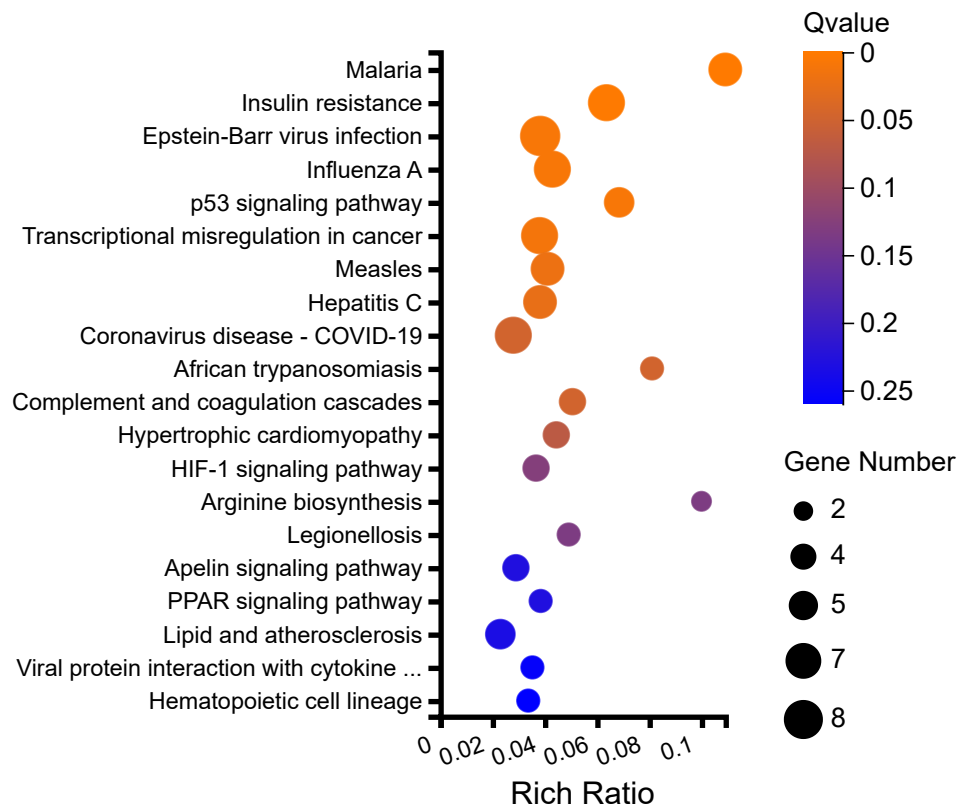

B

Y3 / D180

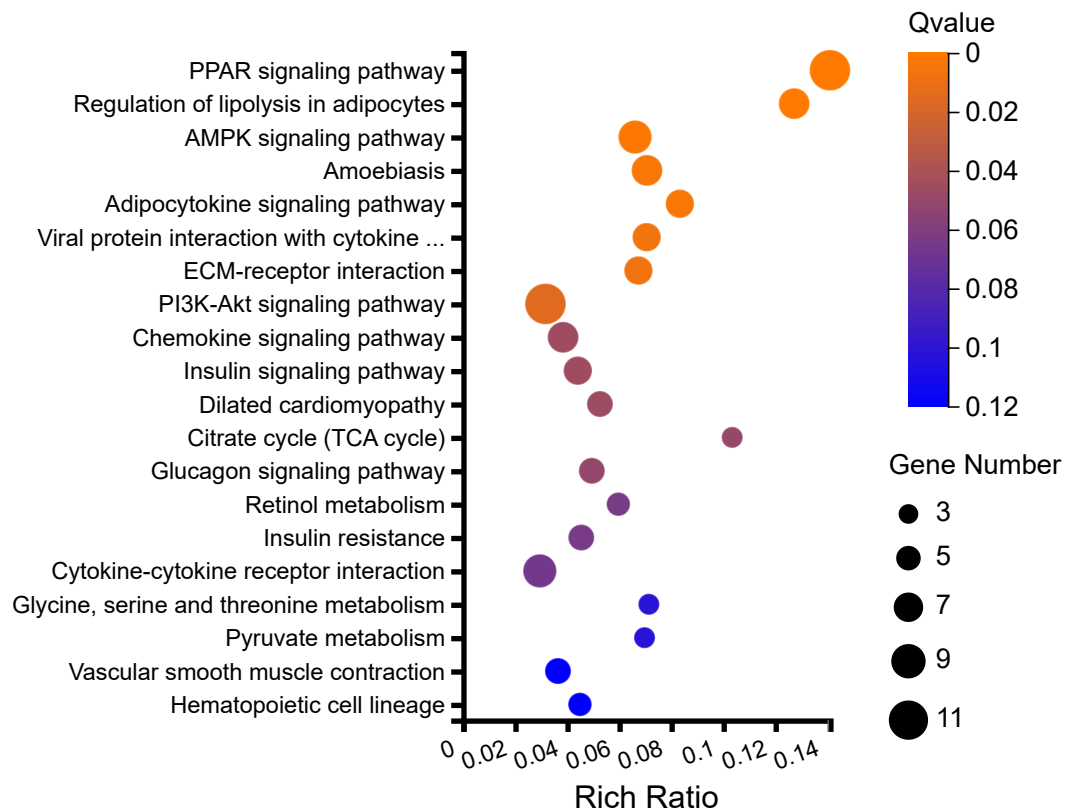

Supplement: Fig._S4.pdf [file Fig._S4.pdf]
