# Supplementary material for: Comprehensive transcriptional analysis of pig facial skin development
Source: PeerJ journal article supplement (doi:10.7717/peerj.15955), 2023-08-28

A

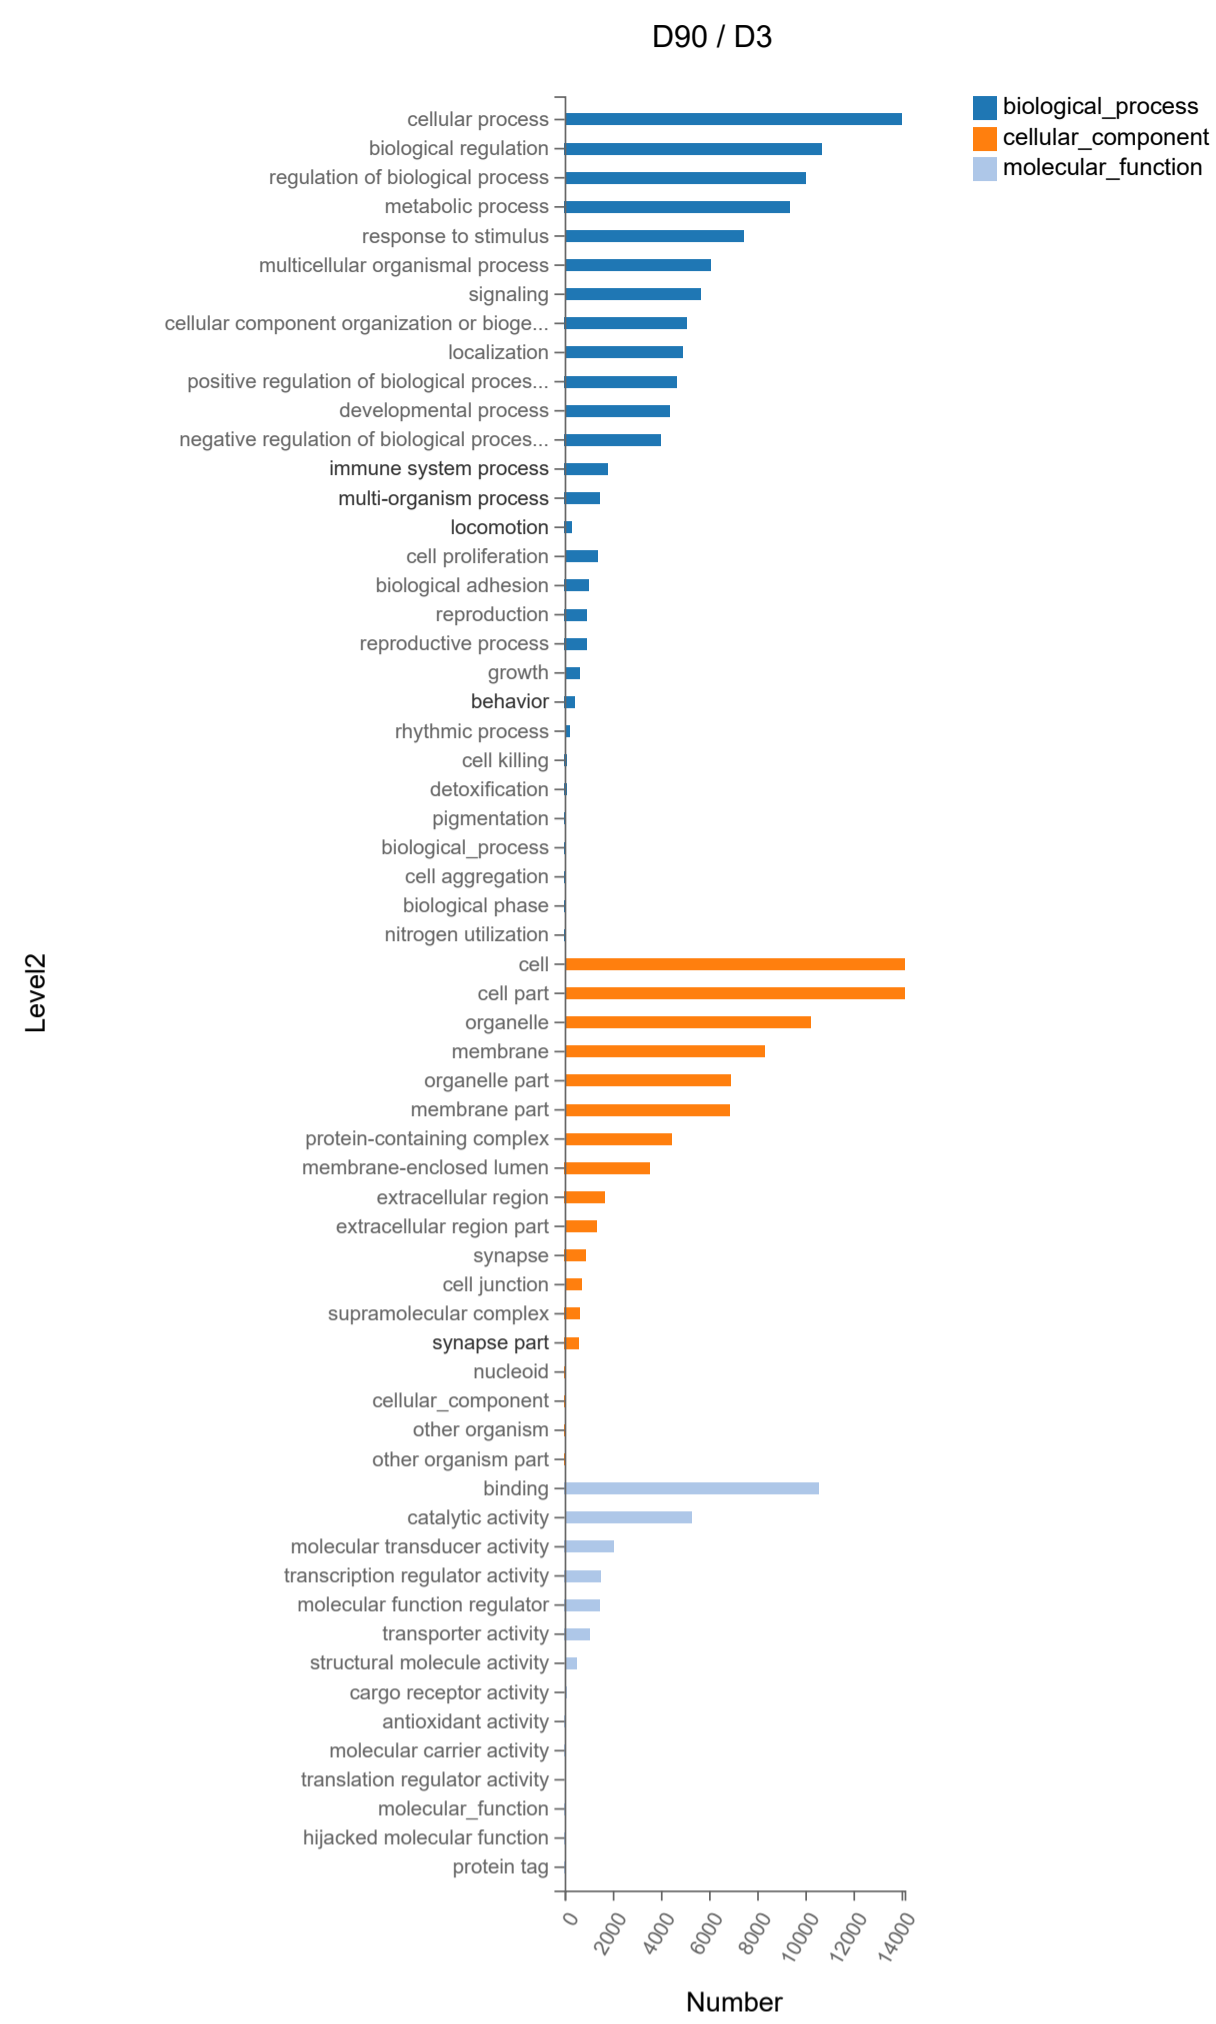

B

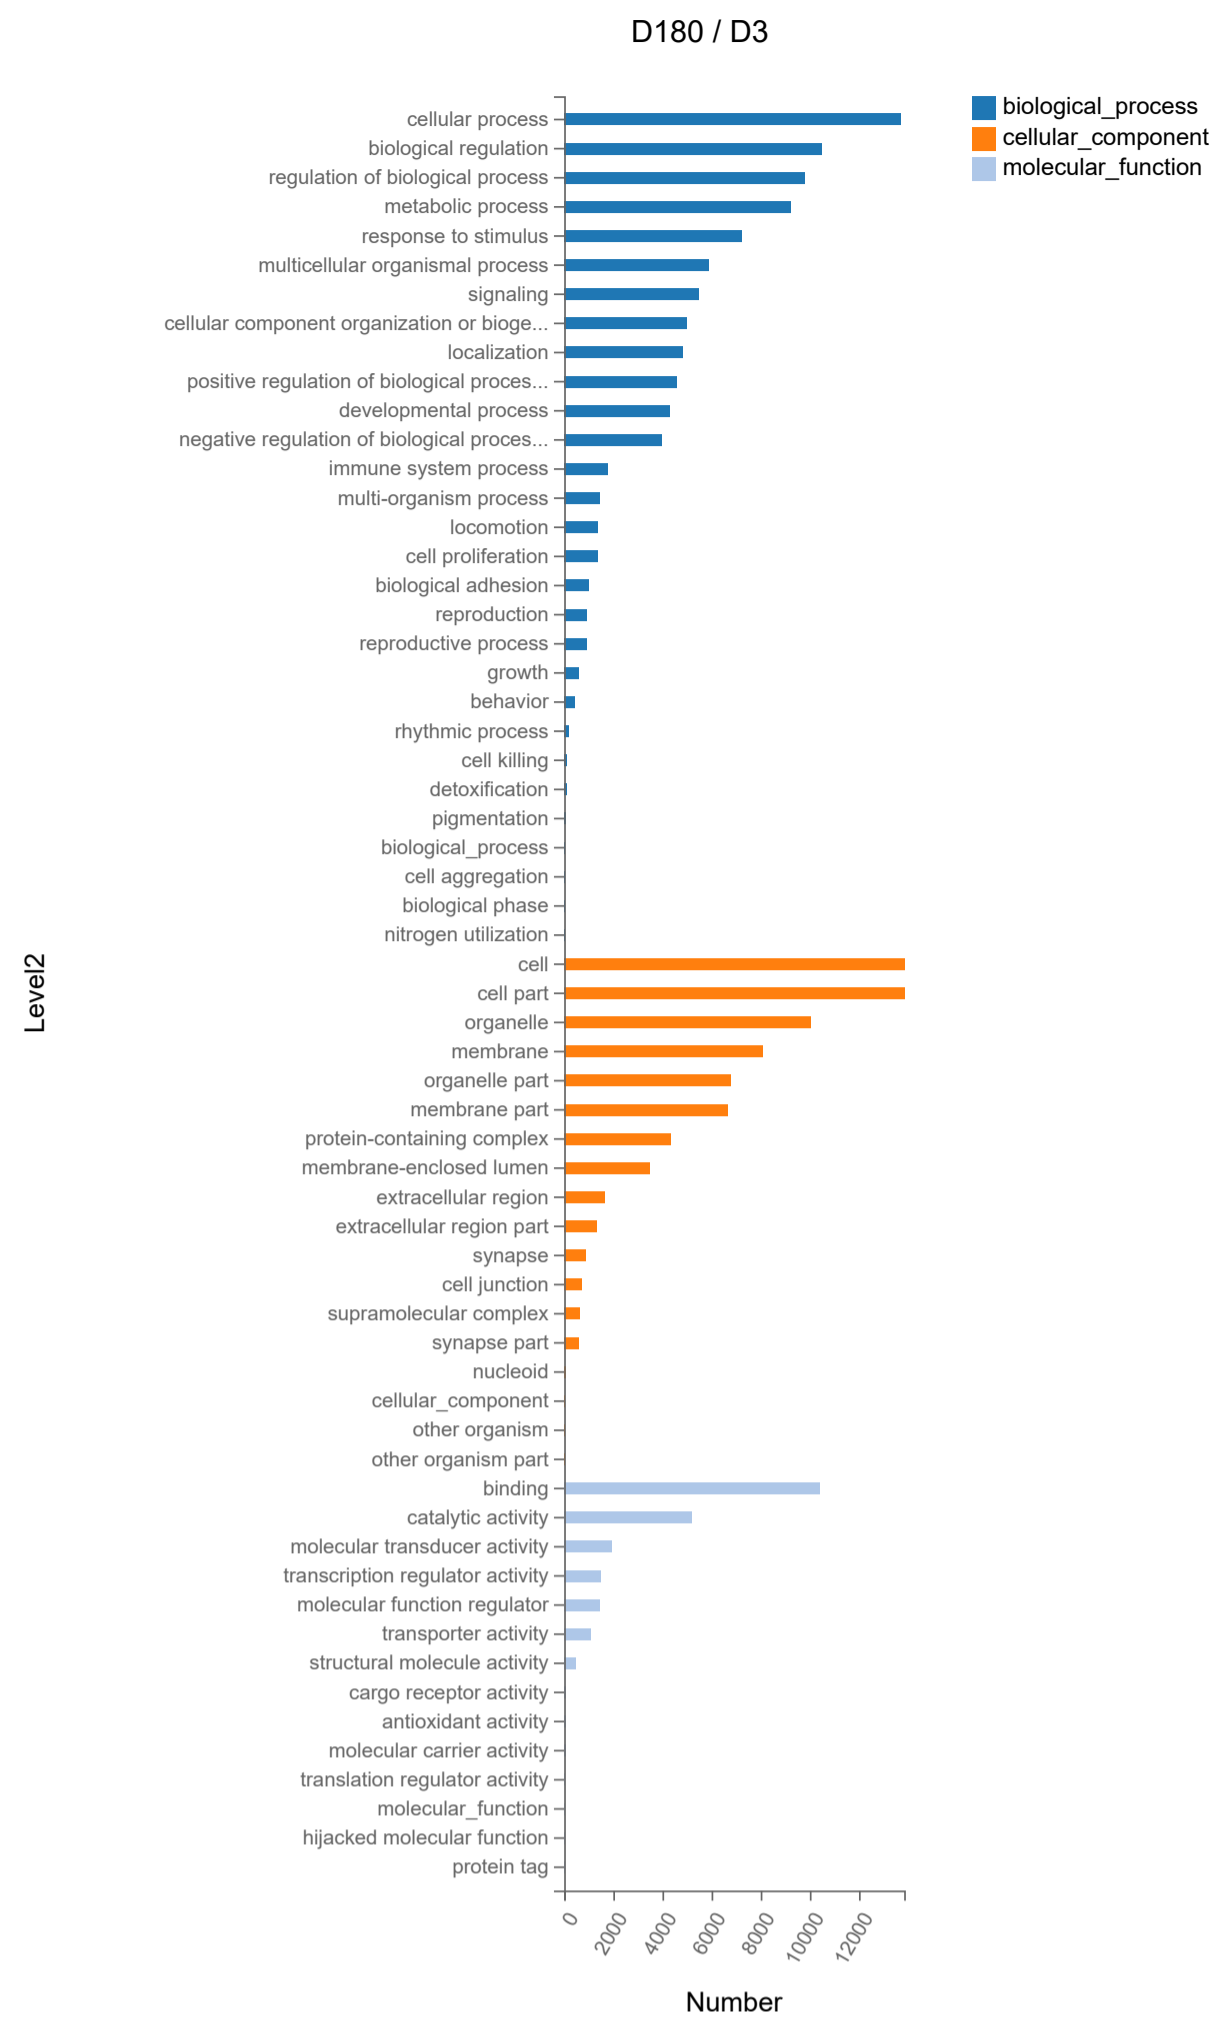

C

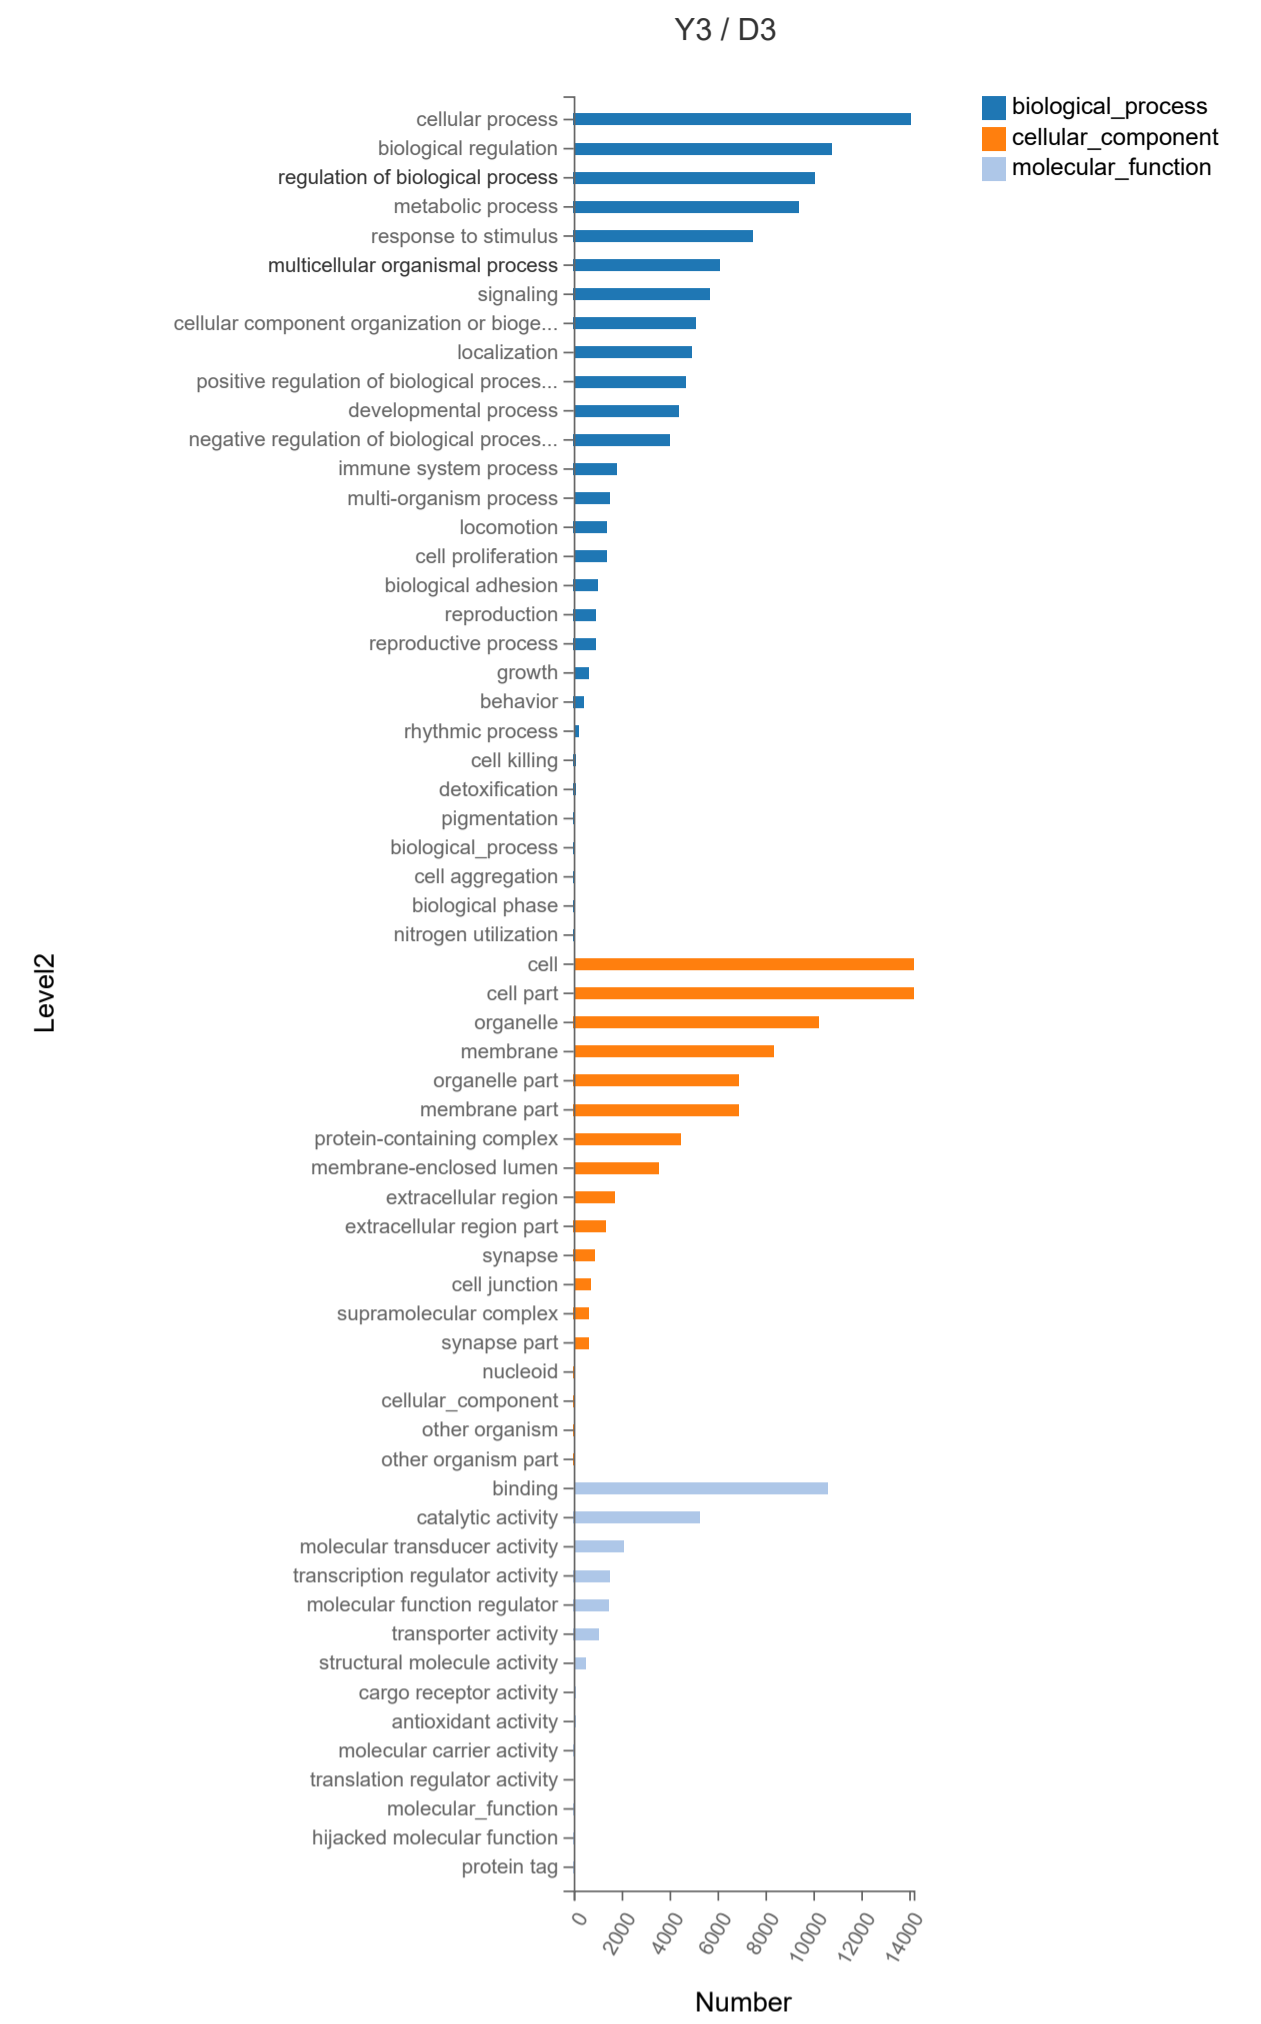

D

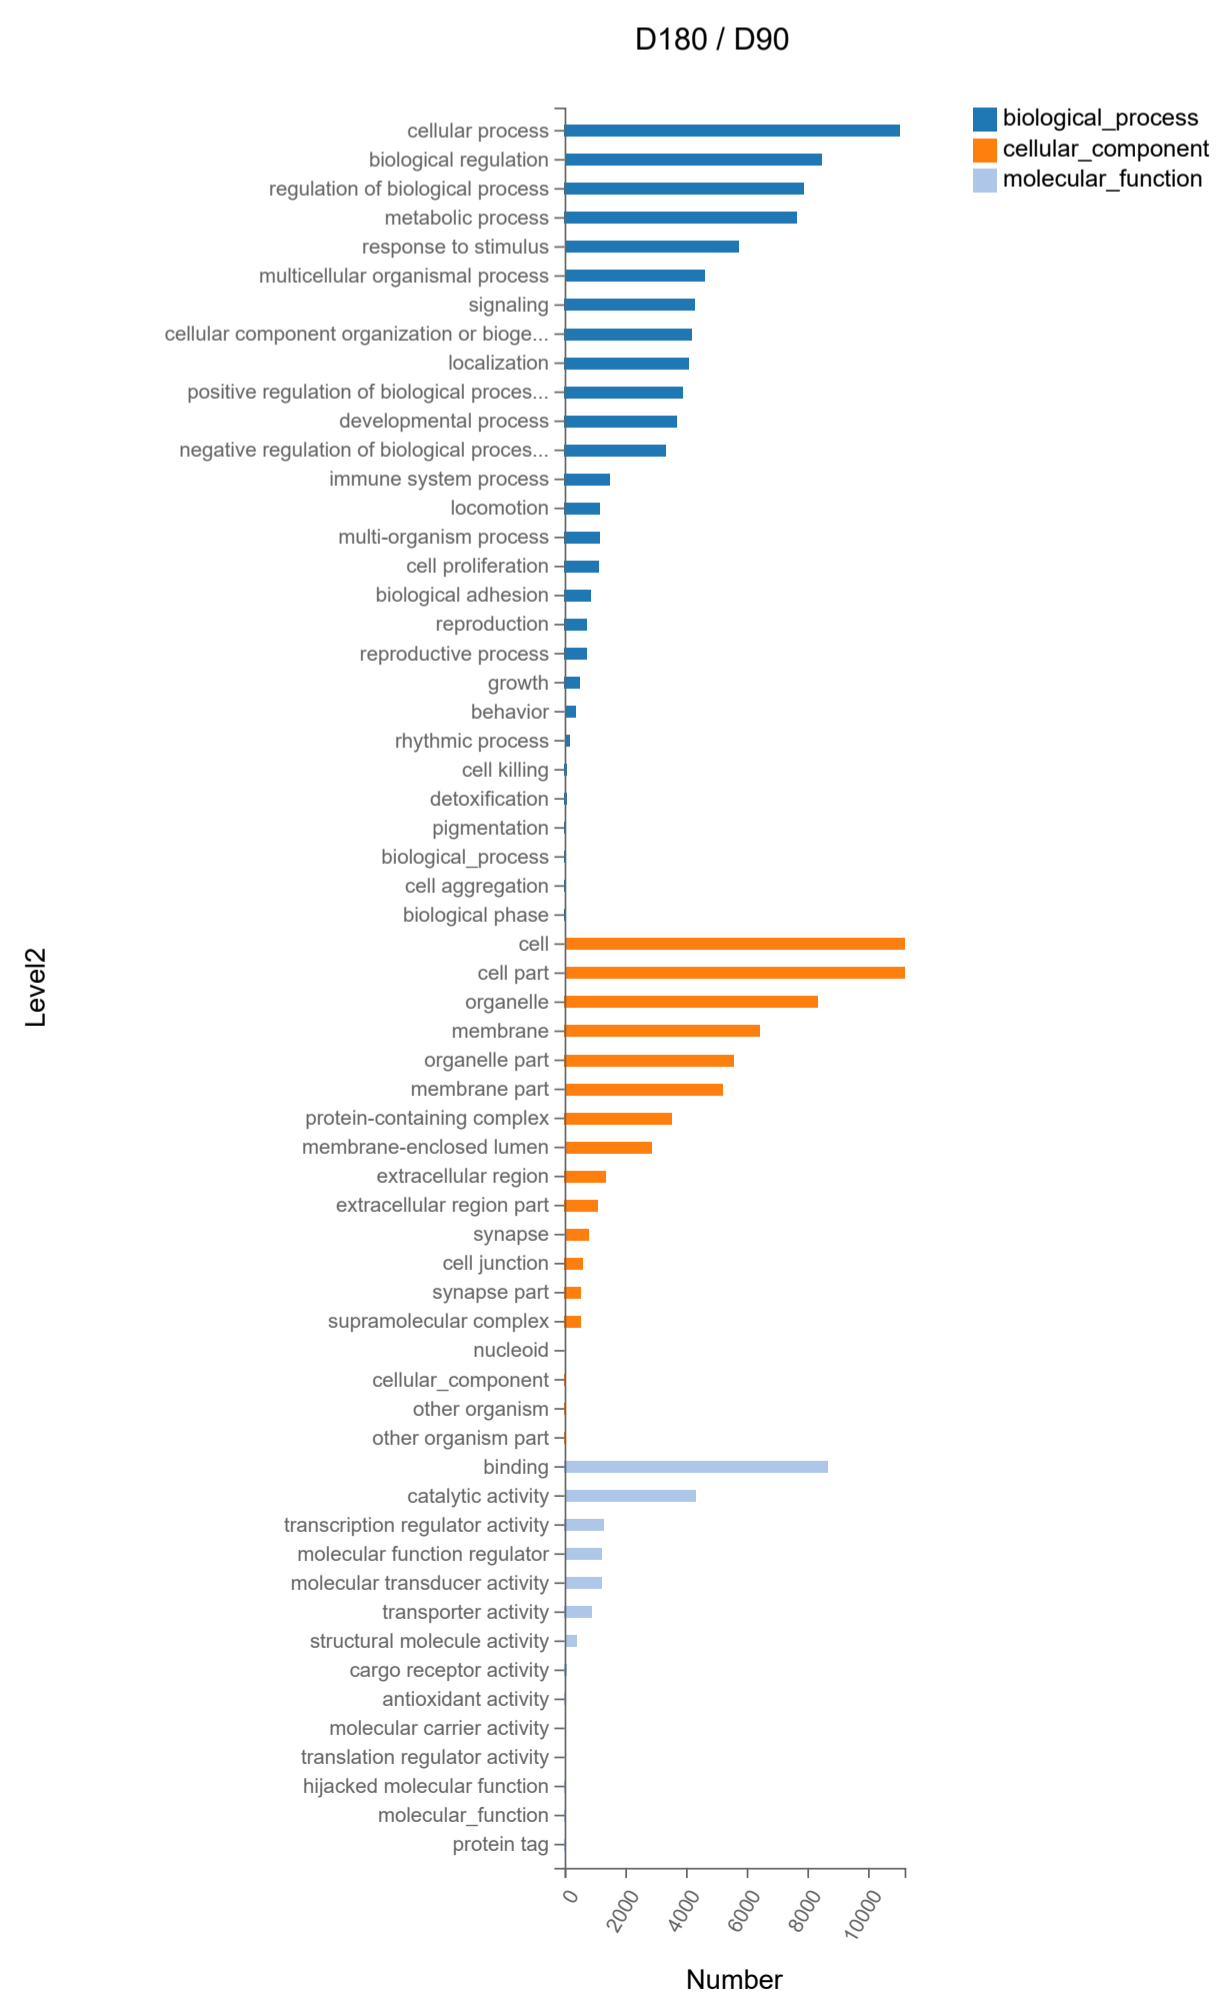

E

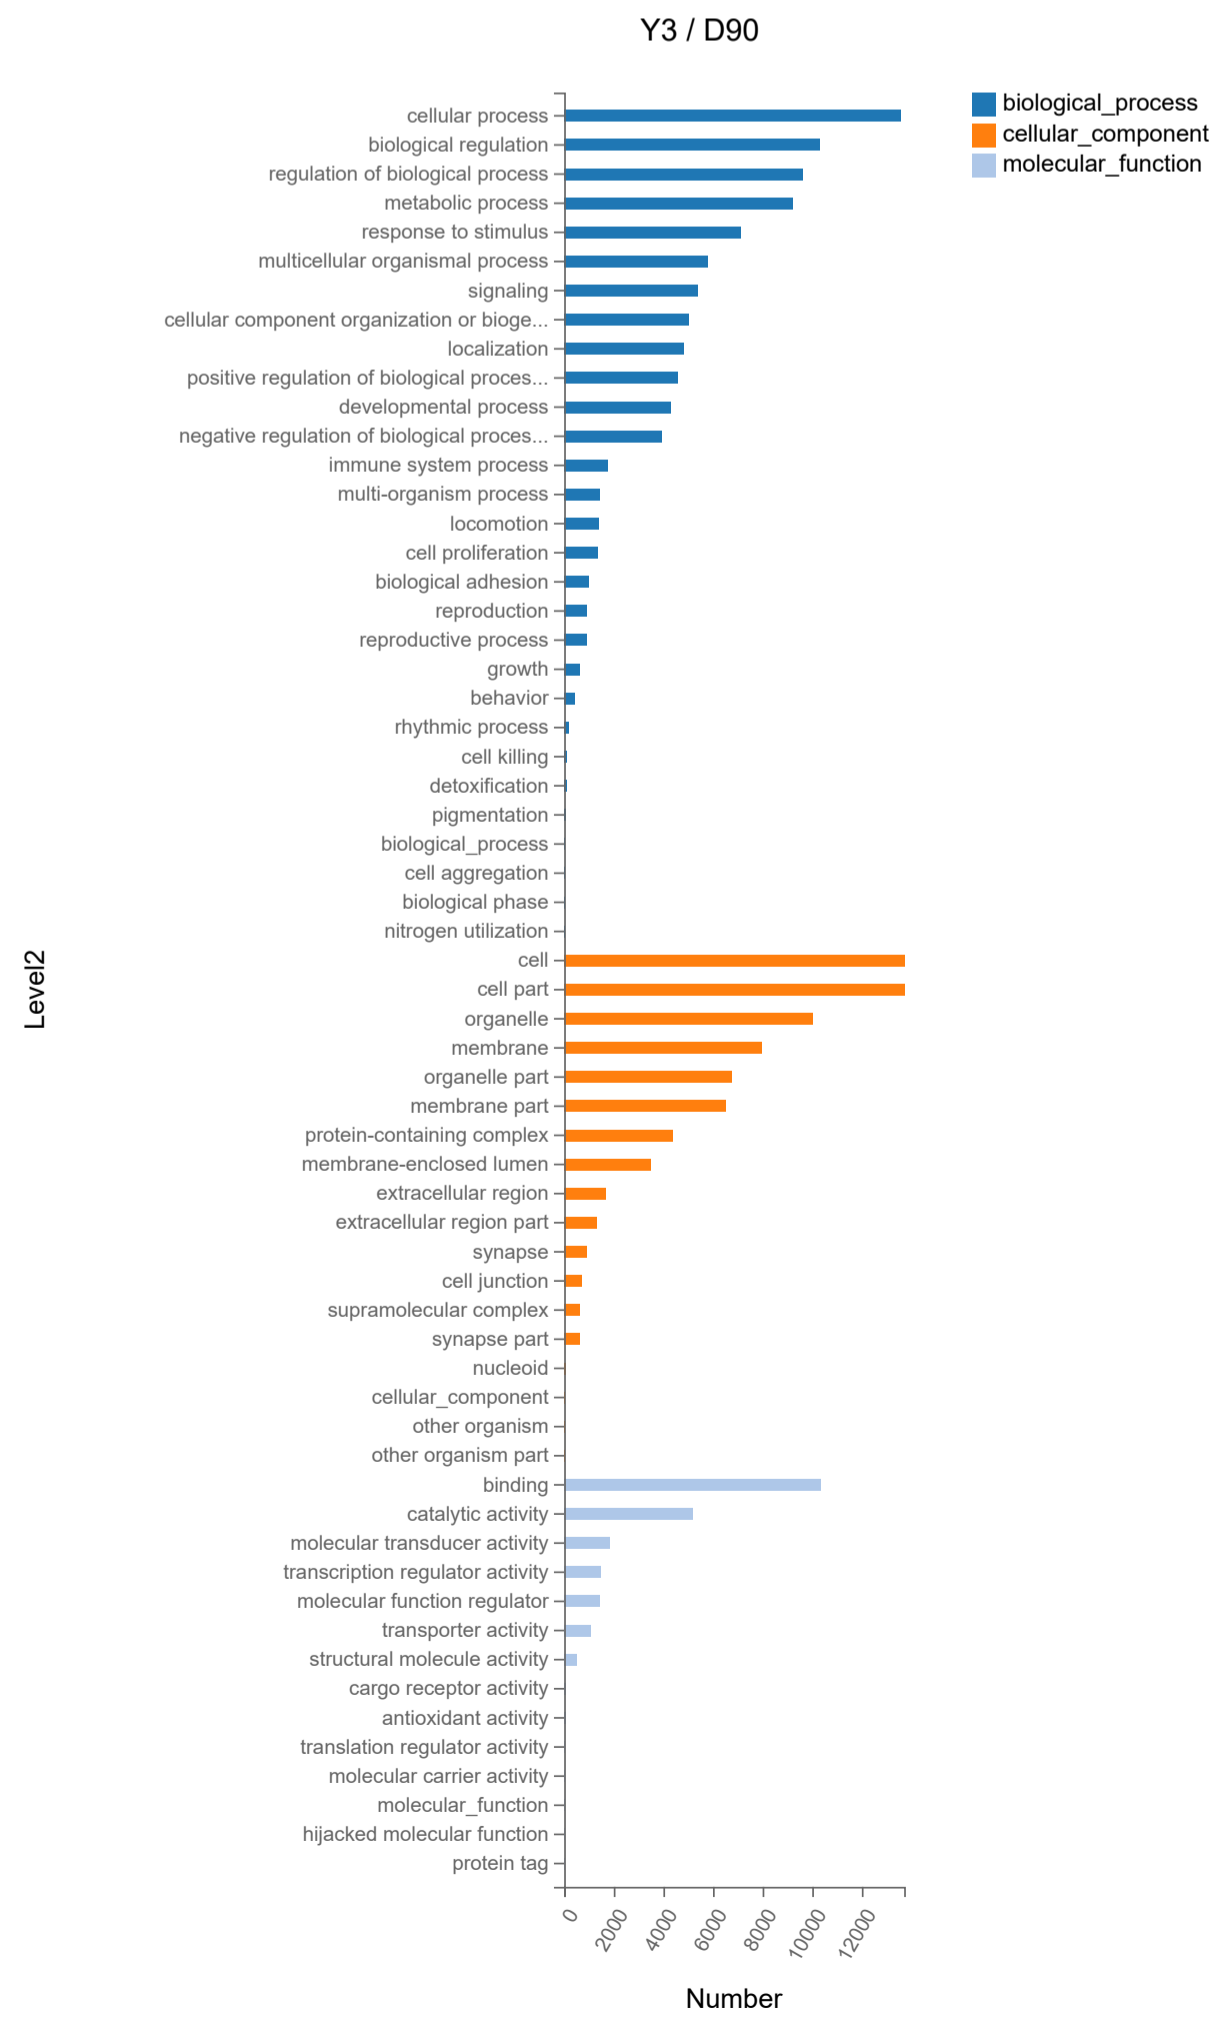

F

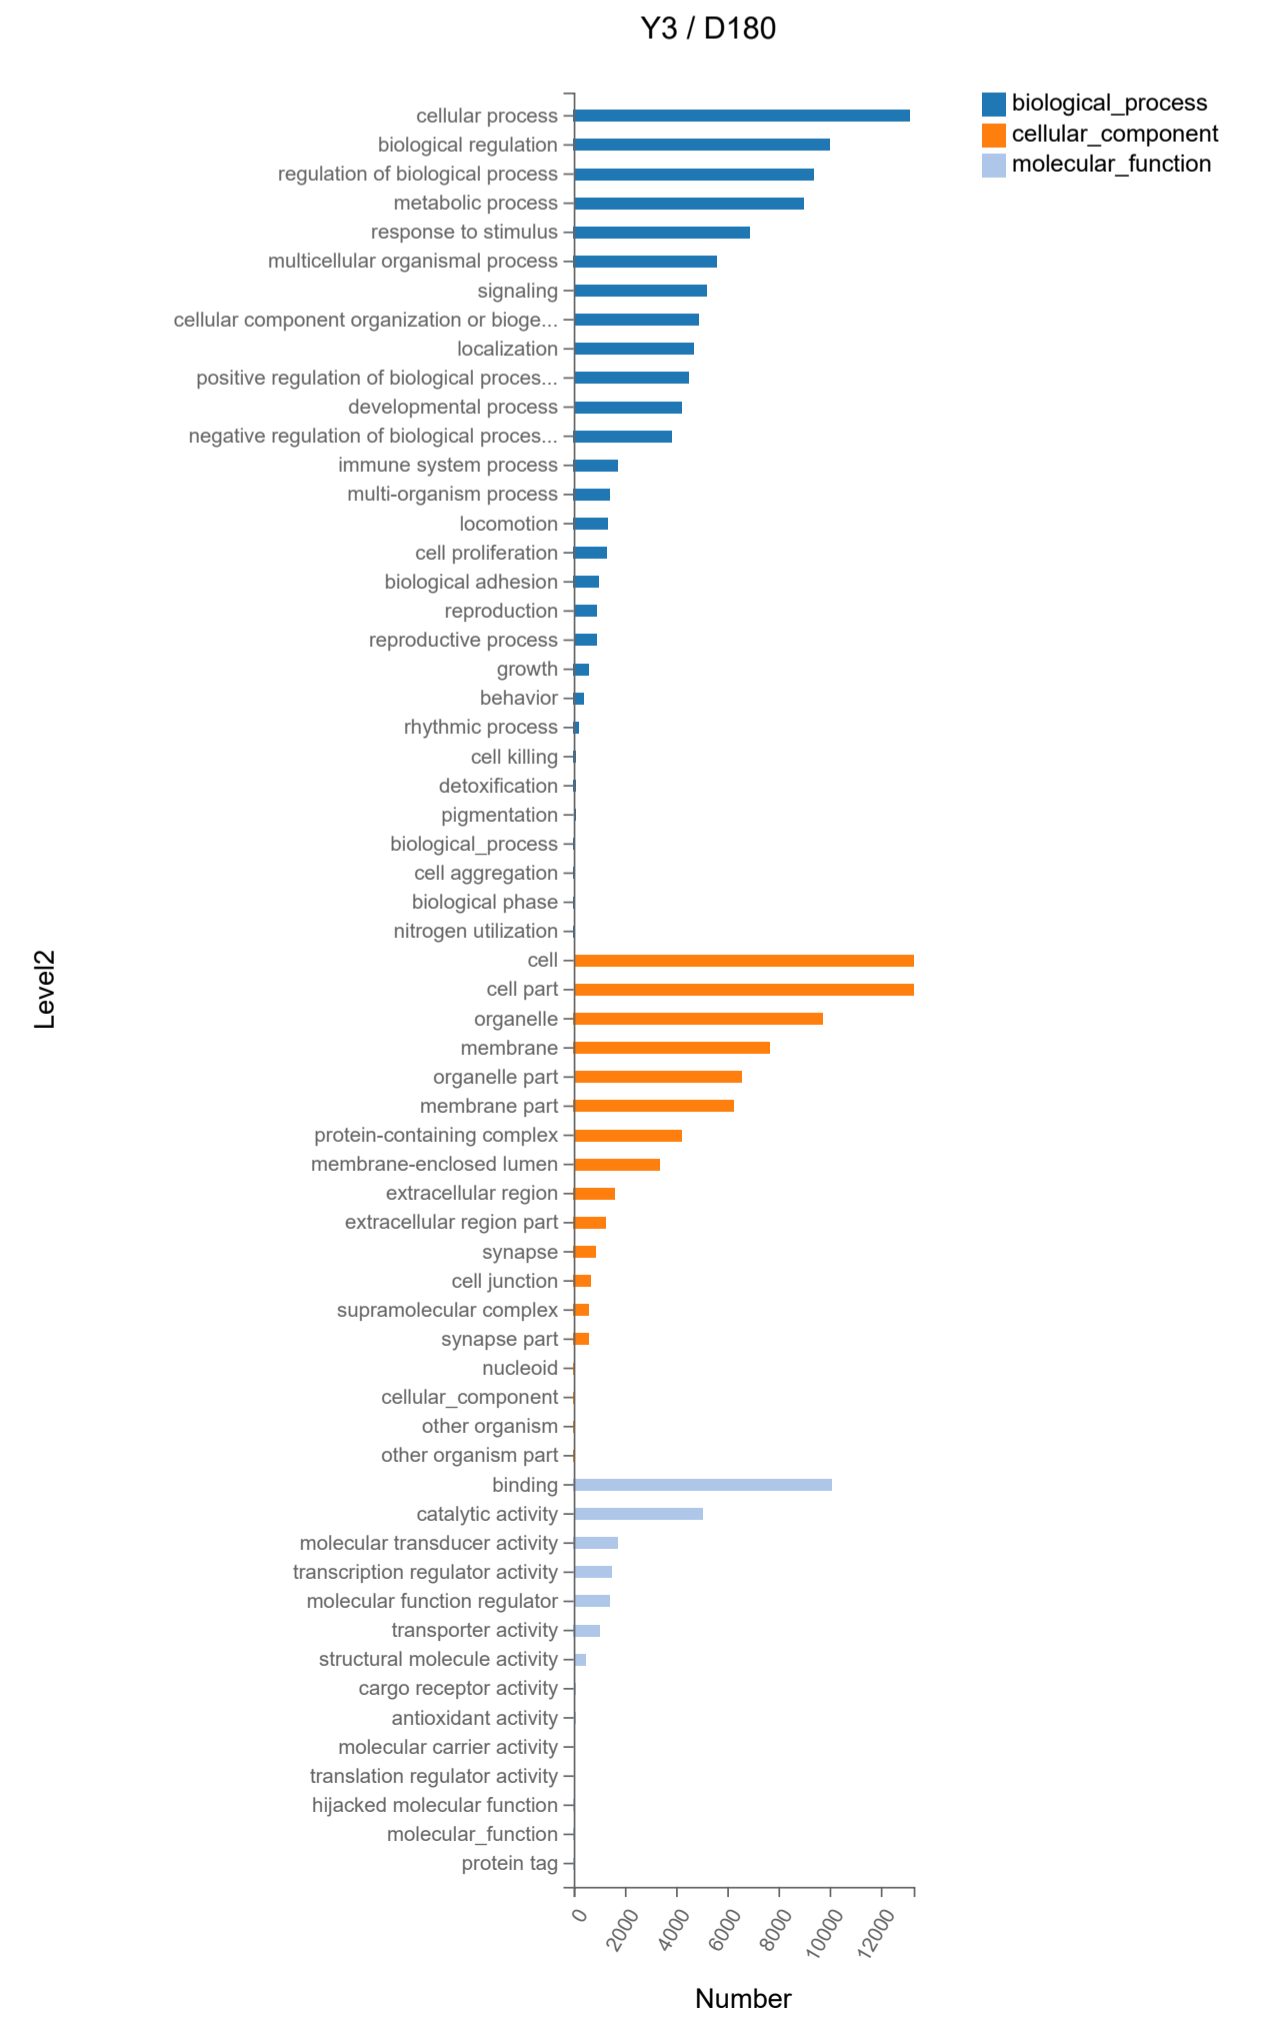

Supplement: Fig._S5.pdf [file Fig._S5.pdf]
