# Supplementary material for: Comprehensive transcriptional analysis of pig facial skin development
Source: PeerJ journal article supplement (doi:10.7717/peerj.15955), 2023-08-28
Supplement: Table_S1.pdf [file Table_S1.pdf]

**Table S1 The primer of RNAs**

| <b>RNAs</b>       | <b>Type</b> | <b>Primer(5'–3')</b>                                     |
|-------------------|-------------|----------------------------------------------------------|
| GAPDH             | -           | F: GTGACGTTGACATCCGTAAAGA<br>R: GCCGGACTCATCGTACTCC      |
| U6                | -           | F: CTCGCTTCGGCAGCACA<br>R: AACGCTTCACGAATTTGCGT          |
| CTSK              | mRNA        | F: TGGATAATTA AAAACAGCTGGGGA<br>R: TGAGGTTGCCTGGCTGAAG   |
| ELN               | mRNA        | F: CCAAAGCCCAGTTCCAGGC<br>R: CTTTAGCTGCGGCCAGGG          |
| MEG3              | lncRNA      | F: CCAGCCTACGAAGAAAGCCA<br>R: CGGCATTCGGCGATAACAAG       |
| URS0001952842     | lncRNA      | F: ACGGCGGCAATATCAAGTCA<br>R: TTGCCCATGCTTGGTTGAGT       |
| ssc-miR-30b-5p    | miRNA       | F: TGTA AACATCCTACACTCAGC<br>R: CAGGTCCAGTTTTTTTTTTTTTTT |
| novel-circ-008475 | circRNA     | F: TGGGTTAATGGAAACAGCGAAA<br>R: CTCAGCGGTCGCATTTTCCTAA   |

GAPDH, the internal reference for mRNA, lncRNA, and circRNA. U6, the internal reference for miRNA.
